# Supplementary material
Source: publisher figshare collection journal article supplement (https://acs.figshare.com/ndownloader/files/13552274)
Supplement: Supplementary file 1 [file 13552274]

## **Supporting Information**

**For**

### **Revisiting the Flow-driven Translocation of Flexible Linear Chains through Cylindrical Nanopores: Is the Critical Flow Rate Really Independent of the Chain length?**

Tao Zheng, Mo Zhu, Jinxian Yang, Jing He, Muhammad Waqas and Lianwei Li\*

*Department of Chemical Physics, University of Science and Technology of China, Hefei, Anhui 230026, China*

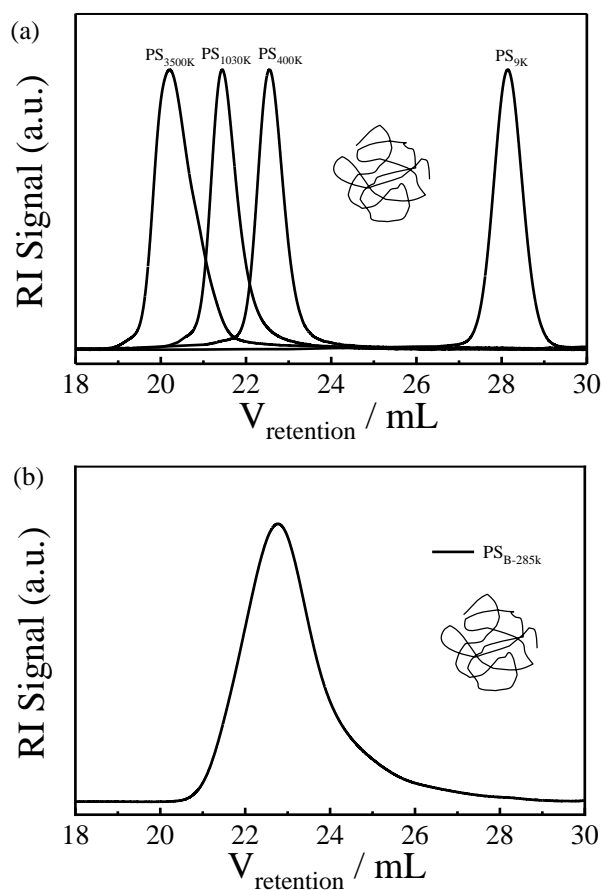

**Figure S1.** SEC characterization of PS samples used in ultrafiltration experiments.

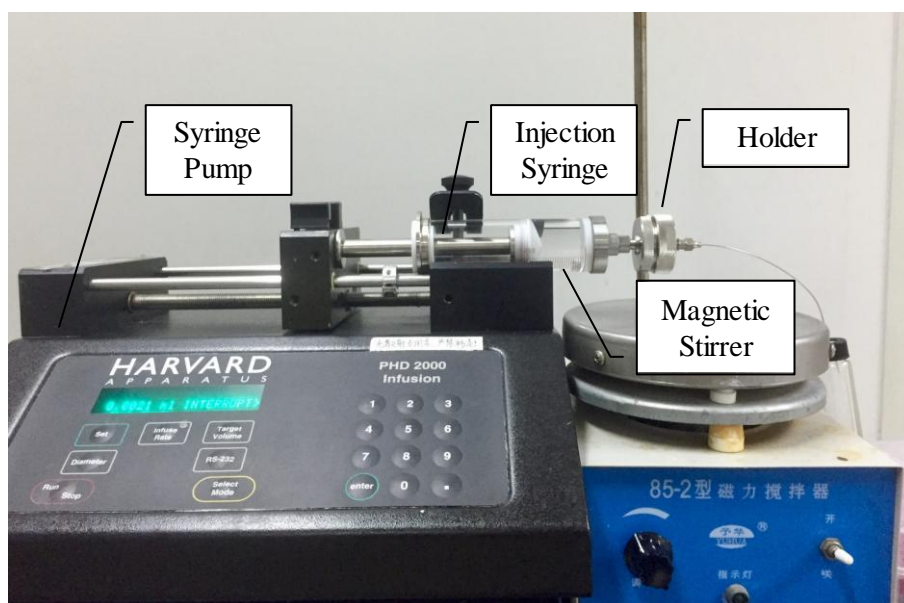

**Figure S2.** Photograph of experimental setup for ultrafiltration study in this work.

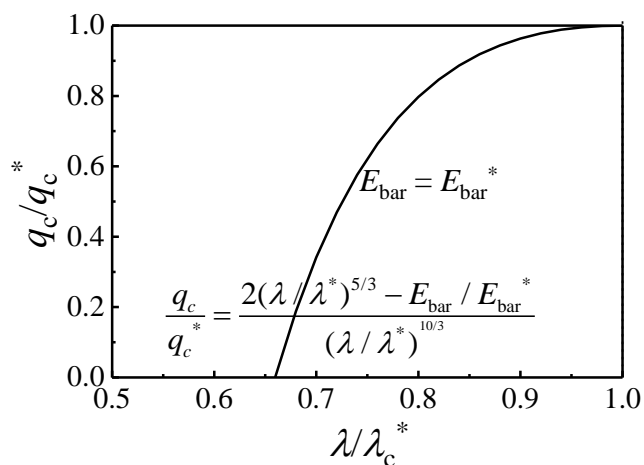

**Figure 3.** The normalized chain size ( $\lambda/\lambda_c^*$ ) dependence of normalized critical flow rate ( $q_c/q_c^*$ ) for polymer chains in the short-chain regime.

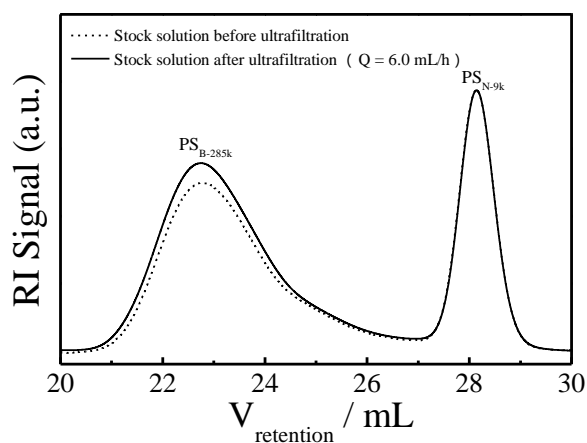

**Figure S4.** SEC curves of stock solutions of one broadly distributed PS sample ( $\text{PS}_{\text{B-285k}}$ ) before and after passing through the AAO membrane.

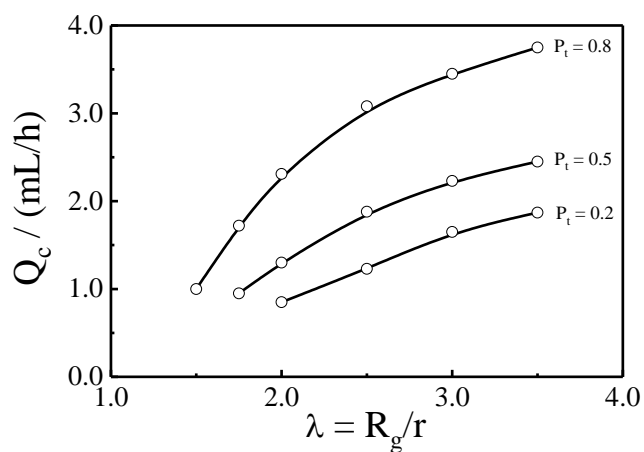

**Figure S5.** Relative chain size ( $\lambda = R_g/r$ ) dependence of the experimentally determined  $Q_c$  at different  $P_t$  values.

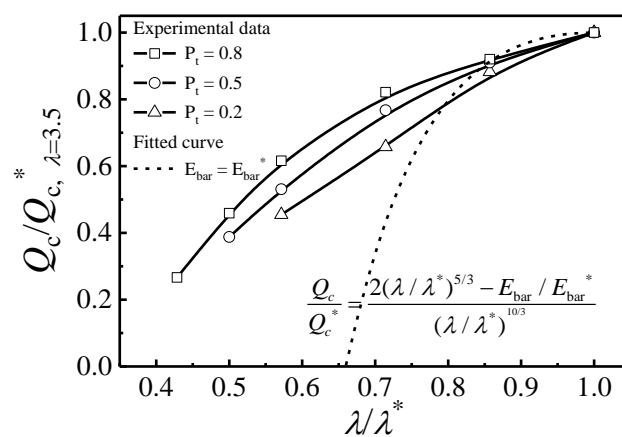

**Figure S6.** Normalized relative chain size ( $\lambda/\lambda^*$ ) dependence of the normalized macroscopic critical flow rate ( $Q_c/Q_c^*$ ), where  $Q_c$  at  $\lambda = 3.5$  was used as  $Q_c^*$  and  $\lambda^* = 3.5$ .

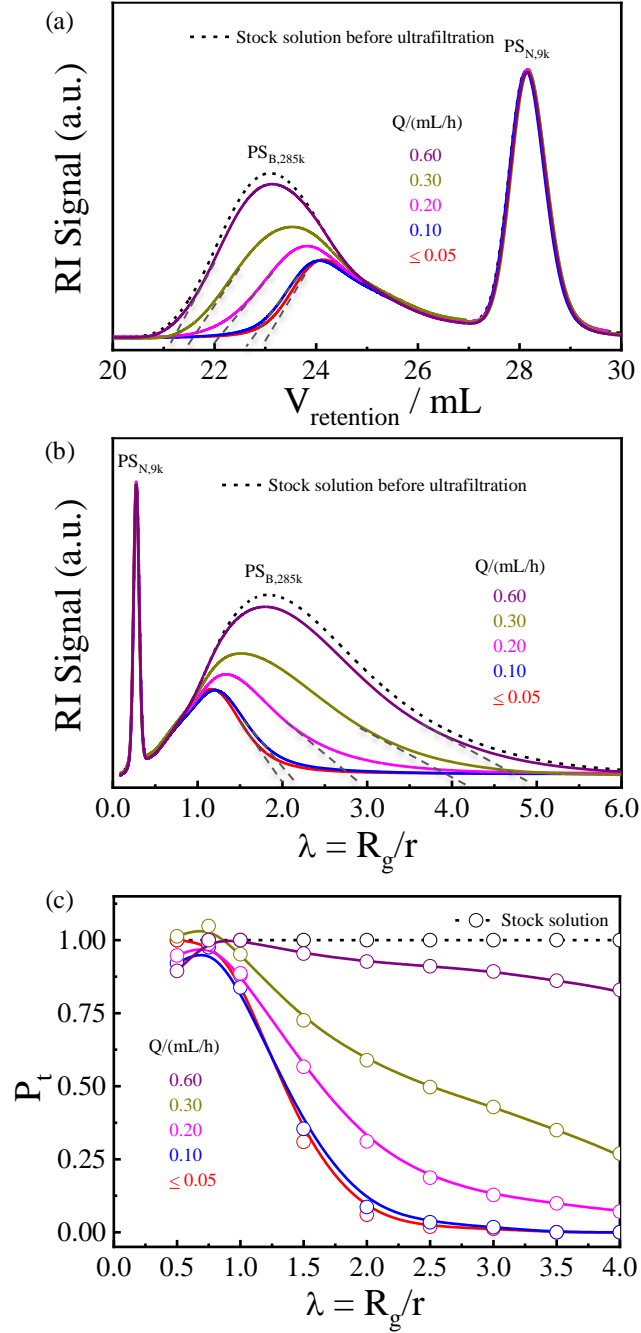

**Figure S7.** (a) and (b) SEC curves of polymer solutions of one broadly distributed PS sample (PS<sub>B-285k</sub>) after passing through an AAO membrane with  $D = 20$  nm from support layer to active layer in toluene at  $T = 20$  °C under different macroscopic flow rates ( $Q$ ), where the molar mass information can be converted in to the size information based on the equation  $R_g = 1.23 \times 10^{-2} M^{0.594}$  (in toluene), and the dashed lines in Figure a and b represent the tangent lines for each curves. (c) Relative chain size ( $\lambda = R_g/r$ ) dependence of the translocation probability ( $P_t$ ) of PS linear chains (PS<sub>B-285k</sub>) under different macroscopic flow rates.

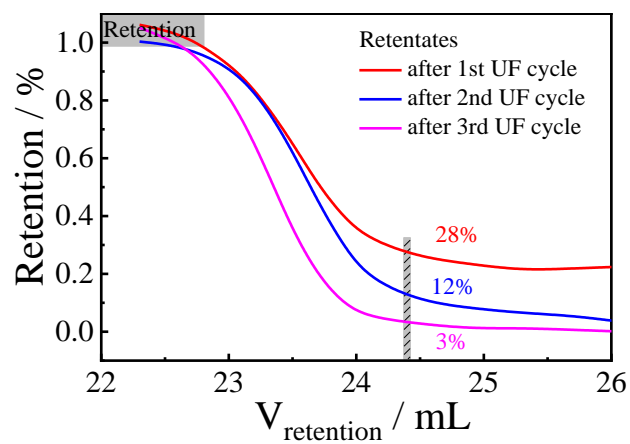

**Figure S8.** Ultrafiltration cycle number ( $N_u$ ) dependence of the relative concentrations ( $C_r/C_s$ ) for each polymer fraction in retentate solutions.
